# Supplementary material for: Tracking Batrachochytrium dendrobatidis Infection Across the Globe
Source: Ecohealth. 2020 Nov 17;17(3):270–9. doi: 10.1007/s10393-020-01504-w (PMC7719156; doi:10.1007/s10393-020-01504-w)
Supplement: Supplementary file 6 — Supplementary material 6 (CSV 4 kb) [file 10393_2020_1504_MOESM6_ESM.csv]

family	sp_num	sp_sampled	sp_Bd_inf	EX	CR	EN	VU	NT	LC	DD
Allophrynidae	3	0	0	0	0	0	0	0	0	0
Alsodidae	30	17	8	0	1	6	2	1	6	1
Alytidae	13	9	8	0	1	0	2	2	4	0
Ambystomatidae	37	23	17	0	4	2	1	0	15	1
Amphiumidae	3	3	2	0	0	0	0	1	2	0
Aromobatidae	126	18	12	0	4	3	3	1	5	2
Arthroleptidae	149	85	47	1	5	17	8	5	51	4
Ascaphidae	2	2	1	0	0	0	0	0	2	0
Batrachylidae	12	6	6	0	1	0	1	0	4	0
Bombinatoridae	8	5	5	1	1	2	1	1	4	1
Brachycephalidae	74	3	2	1	1	1	1	1	2	2
Brevicipitidae	36	4	1	0	1	0	0	3	0	0
Bufonidae	625	183	92	2	43	20	9	9	97	7
Caeciliidae	44	6	0	0	0	0	0	0	5	1
Calyptocephalellidae	5	3	2	0	0	2	1	0	0	0
Centrolenidae	158	36	23	1	1	3	7	2	24	3
Ceratobatrachidae	101	10	2	0	0	1	1	1	7	0
Ceratophryidae	12	1	0	0	0	0	0	0	1	0
Chikilidae	4	0	0	0	0	0	0	0	0	0
Conrauidae	6	5	1	0	1	1	1	0	2	0
Craugastoridae	857	184	93	2	15	29	24	20	90	8
Cryptobranchidae	4	3	3	0	1	0	0	2	0	0
Cycloramphidae	36	6	2	1	1	1	3	1	4	1
Dendrobatidae	199	27	16	0	1	1	3	3	18	1
Dermophiidae	14	5	2	0	0	0	1	0	4	0
Dicroglossidae	213	51	22	1	1	8	4	9	28	4
Eleutherodactylidae	229	60	32	0	13	16	7	5	18	1
Heleophrynidae	7	3	3	0	1	1	0	0	1	0
Hemiphractidae	118	18	14	0	1	6	2	0	7	2
Hemisotidae	9	3	0	0	0	0	0	1	1	1
Herpelidae	10	2	2	0	0	0	0	0	2	0
Hylidae	730	201	141	1	8	15	7	10	150	11
Hylodidae	47	14	12	1	1	1	1	2	9	5
Hynobiidae	81	17	3	0	0	2	4	1	10	0
Hyperoliidae	228	93	62	0	1	9	7	0	73	3
Ichthyophiidae	57	5	0	0	0	0	0	0	2	3
Indotyphlidae	24	10	5	0	0	1	0	0	5	4
Leiopelmatidae	4	4	1	0	1	0	1	0	2	0
Leptodactylidae	215	73	39	1	3	1	1	3	68	1
Limnodynastidae	43	16	9	0	0	1	1	1	12	1
Mantellidae	230	20	13	1	3	2	1	2	16	1
Megophryidae	255	26	2	0	0	3	1	2	20	0
Micrixalidae	24	2	1	0	0	0	1	1	0	0
Microhylidae	691	55	17	1	1	1	3	2	49	2
Myobatrachidae	89	22	12	0	3	3	0	1	15	0
Nasikabatrachidae	2	0	0	0	0	0	0	0	0	0
Nyctibatrachidae	39	2	2	0	0	0	1	0	1	0
Odontobatrachidae	5	0	0	0	0	0	0	0	0	0
Odontophrynidae	52	8	5	1	1	1	1	2	6	1
Pelobatidae	6	9	5	0	0	2	0	1	6	0
Pelodryadidae	215	64	26	1	3	6	5	2	49	4
Pelodytidae	5	1	0	0	0	0	0	0	1	0
Petropedetidae	13	9	3	1	2	2	2	2	3	1
Phrynobatrachidae	94	36	19	0	3	2	2	2	24	3
Phyllomedusidae	66	16	10	0	1	1	0	0	13	1
Pipidae	41	28	13	1	2	3	2	2	20	4
Plethodontidae	478	134	64	1	14	21	17	17	61	5
Proteidae	8	3	3	0	0	1	0	0	2	0
Ptychadenidae	60	22	10	0	0	1	0	1	19	1
Pyxicephalidae	85	17	10	0	1	3	1	1	11	0
Ranidae	407	146	80	1	4	10	18	15	99	4
Ranixalidae	18	7	3	1	1	4	2	1	3	1
Rhacophoridae	428	44	22	1	2	5	3	4	32	1
Rhinatrematidae	13	1	0	0	0	0	0	0	1	0
Rhinodermatidae	3	2	2	0	1	1	0	0	0	0
Rhinophrynidae	1	1	0	0	0	0	0	0	1	0
Rhyacotritonidae	4	0	0	0	0	0	0	0	0	0
Salamandridae	122	43	24	1	2	8	6	9	21	1
Scaphiopodidae	7	6	4	0	0	0	0	0	6	0
Scolecomorphidae	6	2	2	0	1	0	0	0	1	0
Siphonopidae	28	3	0	0	0	0	0	0	2	1
Sirenidae	5	4	3	0	0	0	0	0	4	0
Sooglossidae	4	3	0	0	1	2	0	0	0	0
Telmatobiidae	63	22	21	0	7	4	8	3	0	0
Typhlonectidae	14	2	1	0	0	0	0	0	2	0
