# Supplementary material for: Tracking Batrachochytrium dendrobatidis Infection Across the Globe
Source: Ecohealth. 2020 Nov 17;17(3):270–9. doi: 10.1007/s10393-020-01504-w (PMC7719156; doi:10.1007/s10393-020-01504-w)
Supplement: Supplementary file 7 — Supplementary material 7 (CSV 40 kb) [file 10393_2020_1504_MOESM7_ESM.csv]

paper_wos_id
WOS:000522656400015
WOS:000527476200002
WOS:000526821000001
WOS:000523499000001
WOS:000522830200009
WOS:000523574400023
WOS:000522794000005
WOS:000515197700041
WOS:000524255500002
WOS:000522167400001
WOS:000522167400002
WOS:000518041700015
WOS:000511625400006
WOS:000519934500001
WOS:000516963600002
WOS:000516331000002
WOS:000515971700003
WOS:000517907100001
WOS:000514457500001
WOS:000514313100003
WOS:000514105000041
WOS:000512829800001
WOS:000521162500001
WOS:000517626400001
WOS:000510781700001
WOS:000518637800023
WOS:000509712000001
WOS:000508665700001
WOS:000511457400001
WOS:000505854100001
WOS:000518695100013
WOS:000518695100038
WOS:000521736300008
WOS:000519724900006
WOS:000515398200067
WOS:000514898000082
WOS:000513239900017
WOS:000513239900020
WOS:000509506400012
WOS:000509791200009
WOS:000508744300005
WOS:000508185800001
WOS:000506880100014
WOS:000506880100016
WOS:000504341800009
WOS:000505025900001
WOS:000498749700002
WOS:000505508100001
WOS:000501936500001
WOS:000501721000001
WOS:000500636200003
WOS:000510228900005
WOS:000508217000262
WOS:000499265600001
WOS:000525028400001
WOS:000495857600045
WOS:000504858100015
WOS:000498204600001
WOS:000512727700013
WOS:000512727700042
WOS:000502278100006
WOS:000501204500001
WOS:000495294900005
WOS:000491225900001
WOS:000487812700001
WOS:000504141000001
WOS:000492578600001
WOS:000491905700001
WOS:000521734500002
WOS:000490089800002
WOS:000489770700001
WOS:000489770700027
WOS:000505833200010
WOS:000503417000006
WOS:000495479600010
WOS:000491475300002
WOS:000489688800019
WOS:000488866900011
WOS:000488514600001
WOS:000488866600011
WOS:000488281200011
WOS:000486254000004
WOS:000485281800015
WOS:000484831800009
WOS:000487401900001
WOS:000486138100005
WOS:000486139700004
WOS:000485279000001
WOS:000485275300001
WOS:000488745800055
WOS:000484746300001
WOS:000476839700005
WOS:000488952100014
WOS:000485093600008
WOS:000482626000031
WOS:000482118300007
WOS:000478767600001
WOS:000482406800001
WOS:000480678100037
WOS:000478891300001
WOS:000503912800007
WOS:000497502700012
WOS:000488208000001
WOS:000483908400007
WOS:000483908400013
WOS:000483908400019
WOS:000483908400020
WOS:000483908400025
WOS:000483908400032
WOS:000483908400052
WOS:000484010900006
WOS:000482961700011
WOS:000481616900009
WOS:000481196500001
WOS:000478609900018
WOS:000478093200012
WOS:000475700200007
WOS:000482187500012
WOS:000476003300001
WOS:000473758900001
WOS:000473605900001
WOS:000510152100023
WOS:000474612100016
WOS:000473775400027
WOS:000472995100010
WOS:000472509400009
WOS:000472152300011
WOS:000471204100022
WOS:000472466100001
WOS:000471710000002
WOS:000471638300003
WOS:000472091700003
WOS:000472023000022
WOS:000488889100002
WOS:000487086600002
WOS:000478884800004
WOS:000478884800015
WOS:000475308000044
WOS:000474922100008
WOS:000474922100011
WOS:000473204200003
WOS:000473204200016
WOS:000473752400008
WOS:000472990600002
WOS:000472595600031
WOS:000471880000005
WOS:000470924200005
WOS:000467774800029
WOS:000468717200006
WOS:000467649500030
WOS:000467327300020
WOS:000468866000001
WOS:000467914000008
WOS:000483634200004
WOS:000474063600030
WOS:000469410200031
WOS:000467166000005
WOS:000466402100006
WOS:000465504200023
WOS:000464742300001
WOS:000466131200033
WOS:000465375400051
WOS:000464949600001
WOS:000462993900020
WOS:000475429000007
WOS:000473159300016
WOS:000466104200048
WOS:000466559700007
WOS:000466559700016
WOS:000466559700017
WOS:000465962300013
WOS:000462945600005
WOS:000462738000038
WOS:000461288700004
WOS:000460920900001
WOS:000467399600002
WOS:000466722800005
WOS:000463614900010
WOS:000462144000010
WOS:000461897600010
WOS:000460913600012
WOS:000460620903064
WOS:000460620900086
WOS:000460620900308
WOS:000460620901035
WOS:000460194800009
WOS:000459753700018
WOS:000459456700012
WOS:000458925100015
WOS:000459891700029
WOS:000459094800021
WOS:000458416300001
WOS:000458395600034
WOS:000465431000009
WOS:000462493400008
WOS:000460569000014
WOS:000458814600018
WOS:000457522600003
WOS:000455747900010
WOS:000465430300008
WOS:000455651800001
WOS:000455592300004
WOS:000467378300001
WOS:000455124500001
WOS:000450501500002
WOS:000457137200133
WOS:000527472500019
WOS:000518890300006
WOS:000518890300007
WOS:000518890300018
WOS:000514114400015
WOS:000505750100002
WOS:000495572600012
WOS:000494739700001
WOS:000493293200004
WOS:000485197300001
WOS:000484001500001
WOS:000484001500002
WOS:000484001500004
WOS:000483999800005
WOS:000483878800003
WOS:000475418200004
WOS:000465448800043
WOS:000457426400018
WOS:000456839400012
WOS:000456604600010
WOS:000455990000003
WOS:000455990000005
WOS:000455322600002
WOS:000454687200008
WOS:000453392400003
WOS:000467242100001
WOS:000465428300006
WOS:000451908400005
WOS:000456816500004
WOS:000456816500014
WOS:000457106300003
WOS:000455588400006
WOS:000454307700011
WOS:000453661900001
WOS:000453402600012
WOS:000450303700006
WOS:000451591600012
WOS:000451913200003
WOS:000444932200004
WOS:000450810600022
WOS:000450810600025
WOS:000452890800007
WOS:000452448500005
WOS:000449652200002
WOS:000449772600009
WOS:000452327400007
WOS:000450351700003
WOS:000450351400014
WOS:000452621900015
WOS:000451311700002
WOS:000449653200002
WOS:000448908400028
WOS:000456729700007
WOS:000448438400003
WOS:000449164200002
WOS:000449164200007
WOS:000446339400021
WOS:000445254300014
WOS:000446551000004
WOS:000448082900007
WOS:000446008300002
WOS:000440961000021
WOS:000446369800003
WOS:000444571200053
WOS:000444517900001
WOS:000444230500001
WOS:000446369500001
WOS:000445163400001
WOS:000443430000001
WOS:000448402500033
WOS:000452385700029
WOS:000441953300028
WOS:000445975900009
WOS:000442712600021
WOS:000443163500005
WOS:000443163500018
WOS:000447609102830
WOS:000441538200040
WOS:000440782000054
WOS:000437242900015
WOS:000445295500151
WOS:000443013600007
WOS:000439555900002
WOS:000438200100006
WOS:000439022400011
WOS:000439044900001
WOS:000437900800001
WOS:000438448900001
WOS:000438448900008
WOS:000437249200052
WOS:000437224100002
WOS:000441238500004
WOS:000435940700026
WOS:000434970200040
WOS:000440579100013
WOS:000440579100001
WOS:000432325000021
WOS:000438299200001
WOS:000436077800021
WOS:000435655600057
WOS:000435562500001
WOS:000435562500002
WOS:000434092200006
WOS:000432519600005
WOS:000433717700032
WOS:000435225000008
WOS:000434852700037
WOS:000434852700043
WOS:000445515400002
WOS:000437210500065
WOS:000435225000023
WOS:000433572400008
WOS:000433289600004
WOS:000434232300005
WOS:000432340300001
WOS:000431790900037
WOS:000431757400046
WOS:000432013300004
WOS:000432564700001
WOS:000431991700012
WOS:000430393400022
WOS:000432662400016
WOS:000444372200058
WOS:000438911800004
WOS:000434054800005
WOS:000434185200007
WOS:000431991700001
WOS:000430059900028
WOS:000426349000078
WOS:000430490500001
WOS:000430061100001
WOS:000430367200003
WOS:000431987900031
WOS:000435791300001
WOS:000427254400015
WOS:000429421800028
WOS:000431667800013
WOS:000426530100050
WOS:000436985001257
WOS:000435791300004
WOS:000433024200003
WOS:000433024200022
WOS:000430001900003
WOS:000430001900006
WOS:000429085300054
WOS:000428366200009
WOS:000428053700006
WOS:000427251900011
WOS:000426530100012
WOS:000428657000044
WOS:000427946500002
WOS:000427847800001
WOS:000427382300001
WOS:000427381300001
WOS:000427021400003
WOS:000427021400009
WOS:000426788100001
WOS:000426896800047
WOS:000426663900004
WOS:000435527600011
WOS:000425084400005
WOS:000425084400017
WOS:000430183100007
WOS:000428335900018
WOS:000418964600001
WOS:000430118100015
WOS:000430118100003
WOS:000429309604190
WOS:000429309603093
WOS:000428436600009
WOS:000424881800036
WOS:000426262400053
WOS:000426151800072
WOS:000425760300001
WOS:000425590600051
WOS:000425547500001
WOS:000425088000006
WOS:000425154800010
WOS:000425154800013
WOS:000425154800012
WOS:000425183500021
WOS:000418740200021
WOS:000428797100009
WOS:000426465700012
WOS:000427020600007
WOS:000426253300001
WOS:000426065700002
WOS:000425027700017
WOS:000424210100009
WOS:000424895100003
WOS:000422885200002
WOS:000419689600075
WOS:000419346100001
WOS:000483499500002
WOS:000459616000002
WOS:000453356400007
WOS:000430182900015
WOS:000418325700006
WOS:000452309100007
WOS:000448284700072
WOS:000448066900003
WOS:000446638500002
WOS:000446485400008
WOS:000446632600013
WOS:000441378500007
WOS:000439510600010
WOS:000435790100007
WOS:000432043800006
WOS:000428069400019
WOS:000424137700016
WOS:000423855300008
WOS:000419052200004
WOS:000416804200021
WOS:000419228600006
WOS:000418592100001
WOS:000418810100010
WOS:000417920300001
WOS:000417698200053
WOS:000417576000002
WOS:000417462600001
WOS:000426690900003
WOS:000423293700010
WOS:000419653200006
WOS:000416862700004
WOS:000418824800042
WOS:000418056300001
WOS:000418392200011
WOS:000417724800010
WOS:000417724800019
WOS:000417754100030
WOS:000417183900016
WOS:000416266300005
WOS:000423306100002
WOS:000413387100030
WOS:000418192400012
WOS:000414952000015
WOS:000416896700008
WOS:000414721600011
WOS:000414374600008
WOS:000416891400007
WOS:000415381900002
WOS:000418996900016
WOS:000415900800001
WOS:000415921900035
WOS:000415921900040
WOS:000414883000021
WOS:000414314100006
WOS:000413625100023
WOS:000407985100019
WOS:000413167500051
WOS:000412956900022
WOS:000412845100095
WOS:000412553400006
WOS:000412131900072
WOS:000412788100015
WOS:000412523700015
WOS:000411733300017
WOS:000409053500032
WOS:000408969500021
WOS:000411723200012
WOS:000411524700008
WOS:000412292600004
WOS:000412292600008
WOS:000410481700001
WOS:000411717300008
WOS:000411717300016
WOS:000409453300011
WOS:000408559300009
WOS:000407391900008
WOS:000407320500017
WOS:000407503000014
WOS:000406812100012
WOS:000408781200147
WOS:000408662400027
WOS:000411954600001
WOS:000408441600073
WOS:000408305200001
WOS:000408025400001
WOS:000407895800001
WOS:000407587200008
WOS:000406840100021
WOS:000408757000018
WOS:000407790700010
WOS:000407790700035
WOS:000408074500008
WOS:000406785500007
WOS:000408003400009
WOS:000405326500015
WOS:000405212200001
WOS:000405212200011
WOS:000411787900002
WOS:000406332700002
WOS:000405907800010
WOS:000402751700006
WOS:000405649700083
WOS:000405272200018
WOS:000405093800008
WOS:000405093800038
WOS:000403678600016
WOS:000407808600012
WOS:000403986100028
WOS:000403675200002
WOS:000403255500021
WOS:000403255500022
WOS:000401917000011
WOS:000405955900021
WOS:000403318400083
WOS:000402788800004
WOS:000423257100001
WOS:000423257100006
WOS:000406382700009
WOS:000405736700022
WOS:000405852700006
WOS:000404153600012
WOS:000404153600013
WOS:000402611800136
WOS:000402820600009
WOS:000402407900019
WOS:000402143200009
WOS:000401876700006
WOS:000400962000011
WOS:000403483100007
WOS:000402608700031
WOS:000401345300007
WOS:000401345300008
WOS:000400266300020
WOS:000399566400015
WOS:000394635500008
WOS:000400405100016
WOS:000397800600005
WOS:000400383600026
WOS:000400308800055
WOS:000400343300003
WOS:000399582100001
WOS:000399524400037
WOS:000399451100001
WOS:000406345100018
WOS:000402461600007
WOS:000402461600015
WOS:000402461600023
WOS:000400527200039
WOS:000398855400013
WOS:000399156700015
WOS:000398111000001
WOS:000397836800006
WOS:000398521100010
WOS:000398521100012
WOS:000399737500019
WOS:000398010900005
WOS:000398792200014
WOS:000417353700004
WOS:000417353700005
WOS:000396856000001
WOS:000396201500001
WOS:000397821900005
WOS:000423629200016
WOS:000400353900021
WOS:000398668701230
WOS:000398668702035
WOS:000398107700038
WOS:000395012000019
WOS:000397998300016
WOS:000396015900002
WOS:000396015900023
WOS:000394152700022
WOS:000397102400001
WOS:000394985900004
WOS:000398107700016
WOS:000394930500001
WOS:000394994900001
WOS:000395866400006
WOS:000395678700006
WOS:000393750000011
WOS:000394065900011
WOS:000394501900016
WOS:000393322600025
WOS:000394541500005
WOS:000393643100011
WOS:000394017000008
WOS:000393713800015
WOS:000393713800016
WOS:000393713800017
WOS:000394065900007
WOS:000395173300007
WOS:000406457500024
WOS:000394713000002
WOS:000390735200043
WOS:000397651800001
WOS:000392372300006
WOS:000391621500022
WOS:000391346900074
WOS:000394514100011
WOS:000417361500004
WOS:000417361500014
WOS:000390718800026
WOS:000397911500004
WOS:000426664300107
WOS:000426386200006
WOS:000419555800004
WOS:000417916200001
WOS:000416267300001
WOS:000413849700008
WOS:000413805800005
WOS:000411817900010
WOS:000411097500001
WOS:000408652600003
WOS:000405024000013
WOS:000405024000014
WOS:000399079700003
WOS:000398605000002
WOS:000397341600001
WOS:000397341600004
WOS:000396764600002
WOS:000396764600004
WOS:000392200800023
WOS:000391985300025
WOS:000391688700008
WOS:000389555200011
WOS:000384310600083
WOS:000391161500004
WOS:000389689300001
WOS:000388923900001
WOS:000388923900010
WOS:000388923900017
WOS:000411789300554
WOS:000393201900005
WOS:000391451600003
WOS:000387807200092
WOS:000387475900001
WOS:000389918400017
WOS:000389444800005
WOS:000388201500037
WOS:000387725000033
WOS:000390198500028
WOS:000387808600012
WOS:000385138100005
WOS:000388354200005
WOS:000387659300006
WOS:000385715300005
WOS:000383370300067
WOS:000386711100054
WOS:000395711200005
WOS:000385610400075
WOS:000385563500005
WOS:000385846300025
WOS:000385846300032
WOS:000385429700019
WOS:000384329800031
WOS:000383565500006
WOS:000418957400007
WOS:000387670700006
WOS:000386048200004
WOS:000381060900035
WOS:000384329200023
WOS:000386489200019
WOS:000386489200002
WOS:000395710300002
WOS:000383838300001
WOS:000383404100005
WOS:000389236700004
WOS:000386669700009
WOS:000385621900009
WOS:000384573400009
WOS:000384448300017
WOS:000383809700011
WOS:000382542500005
WOS:000381577800005
WOS:000386363400005
WOS:000384243300001
WOS:000382796200001
WOS:000382267200001
WOS:000381381100065
WOS:000380665700001
WOS:000381208400005
WOS:000381578400033
WOS:000379708500018
WOS:000380117300015
WOS:000390331600016
WOS:000380282100005
WOS:000382430800011
WOS:000381515900027
WOS:000381515200007
WOS:000381528700008
WOS:000379775900010
WOS:000379626200001
WOS:000378292100012
WOS:000378563900027
WOS:000453559200011
WOS:000378942200001
WOS:000378942200004
WOS:000377948800009
WOS:000377218400003
WOS:000383443200011
WOS:000382140300016
WOS:000382140300017
WOS:000382140300018
WOS:000381803300010
WOS:000379658200006
WOS:000378523100015
WOS:000378766500011
WOS:000377963800012
WOS:000382140300015
WOS:000377411300004
WOS:000375896000015
WOS:000393877700001
WOS:000375936400011
WOS:000380278200001
WOS:000376589400051
WOS:000375676800120
WOS:000382402900003
WOS:000377465400008
WOS:000375135100037
WOS:000372555100008
WOS:000375121400021
WOS:000376546000010
WOS:000375207000001
WOS:000381735100011
WOS:000375251800003
WOS:000375336400007
WOS:000375213100026
WOS:000374881300009
WOS:000373539100003
WOS:000373343300023
WOS:000373480100014
WOS:000372364000013
WOS:000374563900010
WOS:000376216700001
WOS:000375213100006
WOS:000373380700023
WOS:000373471200002
WOS:000371733600001
WOS:000373169500001
WOS:000373472700009
WOS:000375732500014
WOS:000374083600001
WOS:000374083600002
WOS:000375206000001
WOS:000372119000001
WOS:000372578000008
WOS:000376185900018
WOS:000375378400017
WOS:000374896800033
WOS:000374197500020
WOS:000372457600092
WOS:000372457600156
WOS:000372457601511
WOS:000372457601556
WOS:000372457601106
WOS:000373211000023
WOS:000371550800001
WOS:000371942300006
WOS:000373934700013
WOS:000371617900010
WOS:000449712200017
WOS:000369137000006
WOS:000371306300002
WOS:000370967000002
WOS:000371822800012
WOS:000369113200003
WOS:000373015800006
WOS:000370291400008
WOS:000371100900002
WOS:000367483700009
WOS:000369408400009
WOS:000377969000021
WOS:000373644000009
WOS:000375858400014
WOS:000368313300014
WOS:000369093200009
WOS:000367681500034
WOS:000392744300005
WOS:000388303700011
WOS:000385506200001
WOS:000383439600010
WOS:000380033300008
WOS:000378930400010
WOS:000378114800003
WOS:000376789400008
WOS:000376475000017
WOS:000374583800132
WOS:000372752800011
WOS:000368963700017
WOS:000368034300010
WOS:000367901800021
WOS:000367097500013
WOS:000392744300002
WOS:000400824600003
WOS:000490117200057
WOS:000367537600053
WOS:000385390500004
WOS:000367097500020
WOS:000376388400002
WOS:000367451400083
WOS:000367374800001
WOS:000361526900006
WOS:000365926300075
WOS:000370892600014
WOS:000369505400012
WOS:000369356700003
WOS:000368187300026
WOS:000367306000037
WOS:000366540600003
WOS:000364944400011
WOS:000364226900016
WOS:000368332800006
WOS:000365798400001
WOS:000368003400001
WOS:000364850900017
WOS:000365378000004
WOS:000364652700008
WOS:000362310400022
WOS:000364168300001
WOS:000364088700006
WOS:000364330400006
WOS:000363138600039
WOS:000363183100039
WOS:000363183100005
WOS:000362510600090
WOS:000364699900014
WOS:000363729100010
WOS:000363471300013
WOS:000363459800008
WOS:000362916000011
WOS:000361836500002
WOS:000362672100005
WOS:000361810500008
WOS:000375200700001
WOS:000360941200001
WOS:000366276100002
WOS:000363723300015
WOS:000363438800031
WOS:000362090700019
WOS:000361601400014
WOS:000361840800008
WOS:000361840800009
WOS:000361837800036
WOS:000361531100004
WOS:000360667200012
WOS:000360311500015
WOS:000360072900001
WOS:000361010200016
WOS:000359950400004
WOS:000360299100065
WOS:000360005600016
WOS:000359843500001
WOS:000360290800005
WOS:000359919900018
WOS:000359461400005
WOS:000358454500009
WOS:000358370900008
WOS:000357958900013
WOS:000358017100019
WOS:000358018400009
WOS:000357285500007
WOS:000355867500002
WOS:000358836800148
WOS:000355263400003
WOS:000358512700003
WOS:000358198200039
WOS:000358162300018
WOS:000357719500018
WOS:000358301300024
WOS:000357234100011
WOS:000356778000009
WOS:000356682200005
WOS:000416220800023
WOS:000357522600011
WOS:000361273200003
WOS:000377966100001
WOS:000357100800001
WOS:000356933800055
WOS:000356932500098
WOS:000356823000004
WOS:000356567400003
WOS:000355652200004
WOS:000355700700048
WOS:000361746600014
WOS:000360373100009
WOS:000354723900007
WOS:000356005900009
WOS:000353912000015
WOS:000361746600015
WOS:000352794200002
WOS:000355595200001
WOS:000375197400001
WOS:000355394300001
WOS:000354918600075
WOS:000355149700005
WOS:000355149700006
WOS:000354386900024
WOS:000355854500012
WOS:000356249200006
WOS:000354777800007
WOS:000354725200021
WOS:000354642400009
WOS:000353928200004
WOS:000353713100087
WOS:000353331500112
WOS:000351770200017
WOS:000351770200011
WOS:000353211700015
WOS:000353335500001
WOS:000352478400034
WOS:000360865700015
WOS:000359394600004
WOS:000355241300004
WOS:000352819300006
WOS:000352560000007
WOS:000352658400232
WOS:000352658401534
WOS:000352658400643
WOS:000352658401048
WOS:000352219000006
WOS:000351353400010
WOS:000351631500017
WOS:000351168800011
WOS:000353007200041
WOS:000356831300029
WOS:000353856500004
WOS:000352083900001
WOS:000354812900001
WOS:000375195300001
WOS:000351278300006
WOS:000351278300007
WOS:000350685900004
WOS:000355064100026
WOS:000353910000019
WOS:000350922800018
WOS:000350033500024
WOS:000349402300013
WOS:000349370500020
WOS:000351983100001
WOS:000349964600001
WOS:000350062300013
WOS:000349301900001
WOS:000349301900010
WOS:000349501400031
WOS:000348512900016
WOS:000349501400006
WOS:000348360700008
WOS:000348349700002
WOS:000348048700006
WOS:000348048700007
WOS:000348048700009
WOS:000348048700008
WOS:000373429900001
WOS:000373429900010
WOS:000360397700008
WOS:000357107100023
WOS:000358434700006
WOS:000357190000009
WOS:000355020900007
WOS:000352488000020
WOS:000351682000002
WOS:000350036100006
WOS:000350036100021
WOS:000346770000028
WOS:000351682000004
WOS:000351682000010
WOS:000364918900008
WOS:000367292700004
WOS:000364397100004
WOS:000431250400012
WOS:000347263500007
WOS:000458570000005
WOS:000209928400351
WOS:000345730800010
WOS:000349368800006
WOS:000347628400007
WOS:000351860800016
WOS:000348581800005
WOS:000347915700003
WOS:000347915700015
WOS:000347084200005
WOS:000346616000001
WOS:000346052300013
WOS:000344802400001
WOS:000351860800015
WOS:000347080900014
WOS:000346285400002
WOS:000345662700005
WOS:000343205200025
WOS:000345697000009
WOS:000345697000001
WOS:000344171500032
WOS:000347183200005
WOS:000347183200010
WOS:000347183200012
WOS:000344752000004
WOS:000344752000008
WOS:000344178100022
WOS:000344178100023
WOS:000343582900025
WOS:000344454000005
WOS:000343799700048
WOS:000343731200102
WOS:000345809300034
WOS:000343075900001
WOS:000342668700010
WOS:000342619100023
WOS:000342244000020
WOS:000342668700020
WOS:000342764600005
WOS:000343007500006
WOS:000343007500007
WOS:000343007500004
WOS:000343963900007
WOS:000341716800001
WOS:000341774800067
WOS:000341774800026
WOS:000341855900056
WOS:000343314200011
WOS:000342846600012
WOS:000342551300003
WOS:000341196600007
WOS:000341569100006
WOS:000341561900001
WOS:000342923400008
WOS:000343230400008
WOS:000340223500022
WOS:000339819800074
WOS:000338707800033
WOS:000340852500014
WOS:000338649800044
WOS:000339633900001
WOS:000343641700005
WOS:000343398000010
WOS:000339326600009
WOS:000337874300018
WOS:000337241400027
WOS:000337087000003
WOS:000337979600013
WOS:000338109700023
WOS:000338909600003
WOS:000335812100001
WOS:000338508200099
WOS:000338503400086
WOS:000338231100003
WOS:000338231100010
WOS:000337117400005
WOS:000335402600002
WOS:000335954900004
WOS:000336080100003
WOS:000335633600002
WOS:000333964700001
WOS:000336415200067
WOS:000335963800009
WOS:000336681000001
WOS:000334182600012
WOS:000334289500004
WOS:000336187700003
WOS:000337681700008
WOS:000338917300038
WOS:000335309100086
WOS:000336863900149
WOS:000339470800008
WOS:000332923500022
WOS:000336337800024
WOS:000333189700009
WOS:000333677500113
WOS:000333348500137
WOS:000332479400022
WOS:000332479400130
WOS:000333777300012
WOS:000333802300007
WOS:000332089400012
WOS:000332116200003
WOS:000348606100027
WOS:000332773700002
WOS:000333774500011
WOS:000331204100015
WOS:000330264000001
WOS:000330264000004
WOS:000330265900022
WOS:000330570000103
WOS:000329944400024
WOS:000329866300088
WOS:000333928300016
WOS:000333875300007
WOS:000332193200008
WOS:000358967800016
WOS:000351516900012
WOS:000347644200004
WOS:000340845400007
WOS:000338803300008
WOS:000335224900015
WOS:000333049502047
WOS:000333049500291
WOS:000333049500337
WOS:000333049501038
WOS:000333049501241
WOS:000331115300005
WOS:000330493900004
WOS:000330254000007
WOS:000330254000024
WOS:000329323700015
WOS:000328597800029
WOS:000339041200015
WOS:000355658600007
WOS:000355659100004
WOS:000209703800003
WOS:000209703800018
WOS:000334326700009
WOS:000347087000001
WOS:000347087000003
WOS:000334441900002
WOS:000442153100001
WOS:000330148000004
WOS:000330325400001
WOS:000327949300145
WOS:000339648300022
WOS:000334816300022
WOS:000332375100002
WOS:000332375100003
WOS:000330043600002
WOS:000330043600003
WOS:000329533900029
WOS:000328802000003
WOS:000327469300014
WOS:000328177700006
WOS:000332375100004
WOS:000327147100045
WOS:000327551600006
WOS:000327551600007
WOS:000327551600008
WOS:000327551600009
WOS:000327313100059
WOS:000326189800003
WOS:000325755100047
WOS:000325819400124
WOS:000325814200092
WOS:000330086400003
WOS:000330086400008
WOS:000330086400009
WOS:000325366500007
WOS:000324019000009
WOS:000324233500024
WOS:000324649800006
WOS:000324266700005
WOS:000324931700020
WOS:000326286700007
WOS:000335277800021
WOS:000325218700118
WOS:000324495300049
WOS:000323870400003
WOS:000321621000011
WOS:000324515600119
WOS:000328339700004
WOS:000327354800018
WOS:000325998800011
WOS:000323935700018
WOS:000322253800010
WOS:000323123300006
WOS:000339639100012
WOS:000323101700010
WOS:000321614700026
WOS:000322336600014
WOS:000323590800001
WOS:000322886400006
WOS:000323830300053
WOS:000322132100070
WOS:000322135600001
WOS:000322191200001
WOS:000322059800049
WOS:000320468900002
WOS:000321203600002
WOS:000320685800008
WOS:000329250300006
WOS:000321148400090
WOS:000320321000004
WOS:000320321000005
WOS:000320322400122
WOS:000320503000015
WOS:000320503000049
WOS:000327903500013
WOS:000322799500369
WOS:000321939400007
WOS:000321078200019
WOS:000321078200024
WOS:000321078200031
WOS:000320990500004
WOS:000320665600006
WOS:000320665600008
WOS:000319886400004
WOS:000319770500011
WOS:000319399600028
WOS:000319350800018
WOS:000318996400011
WOS:000324005700008
WOS:000319703600009
WOS:000320665600007
WOS:000319030700019
WOS:000339620500019
WOS:000319469600009
WOS:000320362700142
WOS:000319966400024
WOS:000319052700061
WOS:000319654700132
WOS:000321390200004
WOS:000318442600006
WOS:000318338600007
WOS:000317911500083
WOS:000317907200027
WOS:000317938100003
WOS:000324303602964
WOS:000317717300161
WOS:000316991400275
WOS:000316991400293
WOS:000316991401417
WOS:000316226100002
WOS:000316542400005
WOS:000316546400045
WOS:000316849200088
WOS:000316006700008
WOS:000328173000004
WOS:000327903300023
WOS:000327903300024
WOS:000320096300047
WOS:000318843900009
WOS:000318843900010
WOS:000318843900012
WOS:000315674100003
WOS:000315032600009
WOS:000318843900011
WOS:000319290400001
WOS:000315465200001
WOS:000315465200002
WOS:000315465200003
WOS:000315465200010
WOS:000315519000039
WOS:000316658800031
WOS:000313510600009
WOS:000315970300133
WOS:000315970300100
WOS:000319986800020
WOS:000316240200016
WOS:000314974800007
WOS:000314474500012
WOS:000316649700008
WOS:000319397500017
WOS:000314845400005
WOS:000314023600060
WOS:000313630300052
WOS:000329810600014
WOS:000327019500022
WOS:000323050500016
WOS:000319726600016
WOS:000318758500012
WOS:000316651200034
WOS:000316376000006
WOS:000313538100025
WOS:000314024900011
WOS:000312534700004
WOS:000331597000001
WOS:000323052200008
WOS:000323052200011
WOS:000373429800001
WOS:000373429800007
WOS:000209703700027
WOS:000323941300003
WOS:000318814800004
WOS:000320354200009
WOS:000209512000007
WOS:000312829100055
WOS:000312976300012
WOS:000314452700021
WOS:000313394400029
WOS:000314146000001
WOS:000312555200005
WOS:000312429000033
WOS:000312228000004
WOS:000312228000011
WOS:000312183100021
WOS:000312228000001
WOS:000317970500006
WOS:000311535700056
WOS:000312357300007
WOS:000310843100001
WOS:000310843100002
WOS:000311767200020
WOS:000310729200009
WOS:000310065600001
WOS:000309856500006
WOS:000327304100009
WOS:000310065600004
WOS:000310600500081
WOS:000310262000005
WOS:000310262000006
WOS:000310446000001
WOS:000308811400004
WOS:000309701100002
WOS:000314229900006
WOS:000312451300008
WOS:000311587200004
WOS:000309675100010
WOS:000309788100008
WOS:000309675100011
WOS:000311231200001
WOS:000310256200001
WOS:000310256200002
WOS:000308638700088
WOS:000308748400032
WOS:000312449300013
WOS:000309021100013
WOS:000308817900011
WOS:000307612900003
WOS:000307400500003
WOS:000308817900009
WOS:000324621806745
WOS:000308063700118
WOS:000314782200001
WOS:000312448700024
WOS:000307088200015
WOS:000309477900002
WOS:000306735200012
WOS:000306559300002
WOS:000306365500016
WOS:000306784300003
WOS:000306837400009
WOS:000306644600080
WOS:000306264600004
WOS:000305582200001
WOS:000305582200005
WOS:000305210400014
WOS:000304509800003
WOS:000309893600008
WOS:000309893600010
WOS:000306264600006
WOS:000303799900007
WOS:000305188900004
WOS:000305188900005
WOS:000305351700035
WOS:000306147400012
WOS:000305926200009
WOS:000305775100017
WOS:000305069800067
WOS:000305069800457
WOS:000304337300053
WOS:000304757200021
WOS:000305069800104
WOS:000305069800247
WOS:000304049000001
WOS:000305336400049
WOS:000308587600019
WOS:000303496500018
WOS:000304024700003
WOS:000303700900035
WOS:000302817700003
WOS:000302552900018
WOS:000303241800006
WOS:000303243200008
WOS:000305345200035
WOS:000301332900001
WOS:000305341600111
WOS:000303149900025
WOS:000305010500021
WOS:000303165000255
WOS:000301227000004
WOS:000302153600008
WOS:000301533100003
WOS:000301371500020
WOS:000301604200016
WOS:000303165000231
WOS:000302424100016
WOS:000302672900001
WOS:000302672900002
WOS:000302672900008
WOS:000302381500155
WOS:000300931100031
WOS:000301914100001
WOS:000300047500009
WOS:000300883200011
WOS:000301762100022
WOS:000299178100006
WOS:000302999600019
WOS:000300436400001
WOS:000300436400002
WOS:000301814300024
WOS:000300125000012
WOS:000299468600017
WOS:000298874900010
WOS:000299419800002
WOS:000299419800008
WOS:000299419800001
WOS:000310335802146
WOS:000301769800012
WOS:000297468100015
WOS:000338902700005
WOS:000338902700008
WOS:000338902700018
WOS:000297468100006
WOS:000355684900028
WOS:000298318000046
WOS:000298318000059
WOS:000299113600016
WOS:000298665600014
WOS:000297702900005
WOS:000305873900008
WOS:000304445100010
WOS:000300382200002
WOS:000300382200003
WOS:000300382200007
WOS:000300382200015
WOS:000300339300013
WOS:000299453600016
WOS:000298521500021
WOS:000298720500028
WOS:000298076300029
WOS:000297502200002
WOS:000297872000002
WOS:000299453600012
WOS:000297348600017
WOS:000297008900041
WOS:000296500900001
WOS:000296026800003
WOS:000295994100012
WOS:000297337300009
WOS:000297699200017
WOS:000296186900036
WOS:000295536000047
WOS:000299166500049
WOS:000297250800012
WOS:000296139200015
WOS:000296409500004
WOS:000295336100361
WOS:000295172700005
WOS:000295745200073
WOS:000294908000013
WOS:000294908000015
WOS:000294908000014
WOS:000295255300042
WOS:000295041700089
WOS:000295371500014
WOS:000294732900009
WOS:000297448000012
WOS:000297204000006
WOS:000293523200013
WOS:000294435100001
WOS:000294125500018
WOS:000293558900059
WOS:000296416500002
WOS:000293287300005
WOS:000208810900007
WOS:000292331100007
WOS:000292819800016
WOS:000289046300009
WOS:000293097300030
WOS:000292956800032
WOS:000292651700011
WOS:000294289800001
WOS:000292798500007
WOS:000292798500023
WOS:000292804100002
WOS:000292395300014
WOS:000291960600035
WOS:000291594000035
WOS:000291341400040
WOS:000292661100016
WOS:000290983100007
WOS:000290726200013
WOS:000289333600003
WOS:000301184000011
WOS:000290491700018
WOS:000290319200004
WOS:000290319200019
WOS:000290355000002
WOS:000290957500004
WOS:000289719100010
WOS:000289494400011
WOS:000290580900007
WOS:000292668200033
WOS:000290678100027
WOS:000290553400006
WOS:000290856400001
WOS:000289255600002
WOS:000295784500011
WOS:000294149100011
WOS:000289537400022
WOS:000288460000023
WOS:000288379000025
WOS:000288019200002
WOS:000288219100001
WOS:000298105300004
WOS:000298105300013
WOS:000288781900005
WOS:000287898800020
WOS:000288320600016
WOS:000298105300005
WOS:000298105300012
WOS:000288278101159
WOS:000289014700009
WOS:000287036200030
WOS:000286380500023
WOS:000285878000002
WOS:000286000100019
WOS:000286000100020
WOS:000286000100021
WOS:000288289800003
WOS:000287451500005
WOS:000287755000003
WOS:000304628100003
WOS:000291079500011
WOS:000290397700015
WOS:000294418500013
WOS:000285853800018
WOS:000287124400005
WOS:000372185600008
WOS:000285875600018
WOS:000298873300004
WOS:000298873300009
WOS:000298959500008
WOS:000298959500014
WOS:000298959500016
WOS:000298959500017
WOS:000284651400010
WOS:000293428800003
WOS:000288312300004
WOS:000290066400006
WOS:000283891800001
WOS:000283946000006
WOS:000283946000007
WOS:000283946000008
WOS:000283946000009
WOS:000283946000010
WOS:000287825000016
WOS:000294563300011
WOS:000294563300012
WOS:000289512000017
WOS:000284120700004
WOS:000284647600001
WOS:000284647600002
WOS:000284647600003
WOS:000284647600004
WOS:000284647600005
WOS:000284647600006
WOS:000284647600007
WOS:000284647600008
WOS:000284647600009
WOS:000284647600010
WOS:000284647600011
WOS:000284647600012
WOS:000284647600013
WOS:000284647600014
WOS:000284647600015
WOS:000284647600016
WOS:000284647600017
WOS:000284647600018
WOS:000284647600019
WOS:000284647600020
WOS:000284647600021
WOS:000284164200001
WOS:000285773500007
WOS:000288473500008
WOS:000282579300002
WOS:000282183500013
WOS:000282655500017
WOS:000283896600013
WOS:000282791700001
WOS:000282261800018
WOS:000282261800019
WOS:000283626600001
WOS:000282176800008
WOS:000289685500012
WOS:000280986700033
WOS:000281461500007
WOS:000280605900042
WOS:000286471400002
WOS:000281411100015
WOS:000281488600009
WOS:000281518500002
WOS:000281518500003
WOS:000278646000017
WOS:000286686600002
WOS:000280297001141
WOS:000280297000634
WOS:000278380500003
WOS:000278284700010
WOS:000277122500007
WOS:000277410800021
WOS:000277690900021
WOS:000277690900034
WOS:000277690900035
WOS:000277867100001
WOS:000278345400008
WOS:000279598200007
WOS:000278297700009
WOS:000279565300014
WOS:000278602300001
WOS:000278054700040
WOS:000278054700041
WOS:000277310400042
WOS:000278427700007
WOS:000277305800021
WOS:000277326800006
WOS:000276780600003
WOS:000286471200009
WOS:000278780600033
WOS:000284716600009
WOS:000275714300043
WOS:000276268700005
WOS:000280595700004
WOS:000280595700013
WOS:000274713200011
WOS:000275769100007
WOS:000275882100015
WOS:000273459600003
WOS:000274761000029
WOS:000274767100009
WOS:000274648400010
WOS:000273778900011
WOS:000276849300014
WOS:000274352300011
WOS:000273723100013
WOS:000285911700004
WOS:000285911700011
WOS:000275358100023
WOS:000287695500004
WOS:000274036800005
WOS:000273957100007
WOS:000271736100022
WOS:000274227100001
WOS:000276107400002
WOS:000278842900006
WOS:000274932300003
WOS:000274378000007
WOS:000273467400004
WOS:000272998000013
WOS:000273112300009
WOS:000271685600007
WOS:000270478200004
WOS:000280071700011
WOS:000280071700012
WOS:000272245000005
WOS:000207820200012
WOS:000271904400001
WOS:000271904400003
WOS:000272919700060
WOS:000271147100020
WOS:000271161700001
WOS:000271019400044
WOS:000269802200027
WOS:000269742600007
WOS:000275940200008
WOS:000271877700032
WOS:000271611900010
WOS:000271732400012
WOS:000270802000002
WOS:000278348100003
WOS:000278348100004
WOS:000278348100008
WOS:000278348100009
WOS:000278348100015
WOS:000268637800007
WOS:000267772200006
WOS:000267772200008
WOS:000207820100012
WOS:000266748200023
WOS:000266752500018
WOS:000268022600009
WOS:000267818100007
WOS:000268355200005
WOS:000275753400006
WOS:000266370700017
WOS:000267340000022
WOS:000267006700007
WOS:000268987300027
WOS:000267102600003
WOS:000265070400004
WOS:000265711500016
WOS:000266369900026
WOS:000267085800015
WOS:000265893200009
WOS:000265893200010
WOS:000264758700008
WOS:000265753300034
WOS:000264794600001
WOS:000264794600002
WOS:000263844100047
WOS:000270837100002
WOS:000270837100004
WOS:000270837100005
WOS:000270837100006
WOS:000270837100015
WOS:000270837100018
WOS:000264542000008
WOS:000263748000020
WOS:000268808800929
WOS:000268808800716
WOS:000262517400003
WOS:000264187100007
WOS:000263452500002
WOS:000263638600001
WOS:000263638600002
WOS:000268897100002
WOS:000270910300015
WOS:000208834400005
WOS:000268981200017
WOS:000263804300004
WOS:000266493400006
WOS:000262839900003
WOS:000262061200001
WOS:000261780600010
WOS:000260535100008
WOS:000261955000009
WOS:000260306700009
WOS:000261395700034
WOS:000260951100004
WOS:000260670100012
WOS:000261845600015
WOS:000261754000002
WOS:000261754000009
WOS:000261754000010
WOS:000260981800007
WOS:000260981800050
WOS:000260913800044
WOS:000260939200002
WOS:000260939200021
WOS:000207820000008
WOS:000260663600006
WOS:000260499700008
WOS:000259908400013
WOS:000260993900002
WOS:000258704400023
WOS:000259879800010
WOS:000259713900022
WOS:000260244500001
WOS:000260244500002
WOS:000264428000001
WOS:000260027100021
WOS:000262696500005
WOS:000259417000016
WOS:000259417000021
WOS:000258247100003
WOS:000259520700001
WOS:000258561200003
WOS:000258134800001
WOS:000256613600006
WOS:000256613600008
WOS:000258668600021
WOS:000258668600022
WOS:000256896500022
WOS:000255503300006
WOS:000257605200008
WOS:000257536100005
WOS:000257536100018
WOS:000207586900005
WOS:000256540300016
WOS:000255954100017
WOS:000254796800020
WOS:000265728500007
WOS:000255295600007
WOS:000255542600002
WOS:000256127900024
WOS:000253943800007
WOS:000254756600004
WOS:000254756600005
WOS:000254756600006
WOS:000253128400005
WOS:000254467300005
WOS:000254928600006
WOS:000255088500021
WOS:000251724600012
WOS:000252175400001
WOS:000207806900003
WOS:000253492900003
WOS:000253267000007
WOS:000261039100003
WOS:000252253300055
WOS:000252768400005
WOS:000259702700010
WOS:000253008400005
WOS:000254904900001
WOS:000256119700004
WOS:000259879300014
WOS:000263130000002
WOS:000263546100006
WOS:000208241400005
WOS:000208241400006
WOS:000252100300026
WOS:000252546500001
WOS:000251770100006
WOS:000251360200014
WOS:000251700700023
WOS:000249981500013
WOS:000250434600001
WOS:000250434600005
WOS:000250297300014
WOS:000249994400004
WOS:000250436300003
WOS:000251210400008
WOS:000250008700019
WOS:000251034100015
WOS:000250184300006
WOS:000250119800003
WOS:000250119800004
WOS:000249487000013
WOS:000249256100010
WOS:000249140400005
WOS:000250173600008
WOS:000249064700058
WOS:000249482300001
WOS:000249482300002
WOS:000250399000006
WOS:000247398800010
WOS:000248921100013
WOS:000248921100023
WOS:000248484300021
WOS:000250377200021
WOS:000248231900004
WOS:000248231900009
WOS:000246842000037
WOS:000246637600018
WOS:000246599900002
WOS:000246599900030
WOS:000248331800003
WOS:000207806700001
WOS:000207806700002
WOS:000207806700006
WOS:000246250600018
WOS:000244796600001
WOS:000246116500006
WOS:000244467500051
WOS:000245261700018
WOS:000245325200014
WOS:000244520400015
WOS:000244705400002
WOS:000245070700009
WOS:000245325000002
WOS:000245325000003
WOS:000244770000002
WOS:000243325800012
WOS:000242765400012
WOS:000245222100001
WOS:000245222100009
WOS:000245222100010
WOS:000243403900023
WOS:000247112200003
WOS:000247112200006
WOS:000247112200009
WOS:000245140600006
WOS:000244271900009
WOS:000242624600018
WOS:000242624600017
WOS:000244439500010
WOS:000244268700012
WOS:000243959800017
WOS:000242268900004
WOS:000240826500010
WOS:000242930700008
WOS:000242930700009
WOS:000246628700008
WOS:000241863400037
WOS:000241912800009
WOS:000241912800010
WOS:000240273500014
WOS:000241127500007
WOS:000241127500008
WOS:000241250600008
WOS:000241483700006
WOS:000241483700007
WOS:000238850200019
WOS:000239457900007
WOS:000239198800009
WOS:000238185600001
WOS:000238674000007
WOS:000238036200005
WOS:000239580000001
WOS:000239580000009
WOS:000237303500008
WOS:000238180800002
WOS:000238180800005
WOS:000238180800006
WOS:000238180800007
WOS:000238180800008
WOS:000235780700001
WOS:000235780700031
WOS:000237170200011
WOS:000234576100008
WOS:000234538400023
WOS:000234538400031
WOS:000243664700002
WOS:000236285900007
WOS:000240046900011
WOS:000237845200004
WOS:000278639300021
WOS:000234145300004
WOS:000236188700021
WOS:000236039300006
WOS:000236039300007
WOS:000236039300008
WOS:000236039300011
WOS:000233067300015
WOS:000233858900025
WOS:000234066700003
WOS:000234066700012
WOS:000235337601372
WOS:000232670900011
WOS:000232137900011
WOS:000232137900012
WOS:000232137900013
WOS:000232137900014
WOS:000232137900015
WOS:000232192000030
WOS:000234366500006
WOS:000235380900004
WOS:000232573200011
WOS:000231633900006
WOS:000232744200015
WOS:000231350900040
WOS:000229164600006
WOS:000231313100011
WOS:000231965000001
WOS:000231189700003
WOS:000230470500002
WOS:000233048200003
WOS:000231649300023
WOS:000229355500003
WOS:000229355500006
WOS:000229355500008
WOS:000229355500009
WOS:000230658000008
WOS:000230860300002
WOS:000228091800007
WOS:000227351900002
WOS:000226438600011
WOS:000226736100002
WOS:000229123000018
WOS:000223970600008
WOS:000228376400002
WOS:000226297500019
WOS:000225528000007
WOS:000230855300021
WOS:000223381700011
WOS:000223709700005
WOS:000225164000006
WOS:000225160300026
WOS:000226045400009
WOS:000226045400010
WOS:000223026500013
WOS:000225911700005
WOS:000225639500003
WOS:000225639500006
WOS:000223239600017
WOS:000224225800007
WOS:000223266500011
WOS:000222892700020
WOS:000224037700006
WOS:000221467500001
WOS:000222140500010
WOS:000221336700013
WOS:000224742400005
WOS:000220874100002
WOS:000220685800009
WOS:000188789700016
WOS:000226725500001
WOS:000189359800002
WOS:000221525400083
WOS:000220379300010
WOS:000220220400011
WOS:000186596200010
WOS:000189110700015
WOS:000185294200016
WOS:000185983100007
WOS:000184500100004
WOS:000184500100016
WOS:000185459200034
WOS:000183734800027
WOS:000184749100010
WOS:000182612600013
WOS:000181189400005
WOS:000181202000054
WOS:000181229500004
WOS:000181229500005
WOS:000185910400015
WOS:000185910400034
WOS:000184058500006
WOS:000181477800017
WOS:000181276500012
WOS:000181240800011
WOS:000180846200028
WOS:000181027100012
WOS:000180421000008
WOS:000189468000023
WOS:000179424700010
WOS:000178380400031
WOS:000179539000043
WOS:000177703800007
WOS:000177262000006
WOS:000176644900020
WOS:000177296800007
WOS:000176586200011
WOS:000175815600007
WOS:000174887300017
[truncated: 60 more rows]
