# Supplementary material for: Tracking Batrachochytrium dendrobatidis Infection Across the Globe
Source: Ecohealth. 2020 Nov 17;17(3):270–9. doi: 10.1007/s10393-020-01504-w (PMC7719156; doi:10.1007/s10393-020-01504-w)
Supplement: Supplementary file 8 — Supplementary material 8 (CSV 4 kb) [file 10393_2020_1504_MOESM8_ESM.csv]

country	iso3	iso2	possible_first_detection	first_detection	reference
Brazil	BRA	BR	-	1894	Rodriguez et al., 2014
Colombia	COL	CO	-	2004	Ruiz and Rueda-Almonacid, 2008
Peru	PER	PE	-	1988	Rodriguez & Catenazzi 2017
Ecuador	ECU	EC	-	1984	Byrne et al., 2019
China	CHN	CN	1933	1959	Zhu et al., 2014
Indonesia	IDN	ID	2001	2005	Swei et al., 2011
India	IND	IN	2008	2008	Nair et al., 2011
Mexico	MEX	MX	-	1972	Cheng et al., 2011
Venezuela (Bolivarian Republic of)	VEN	VE	-	1895	Scheele et al., 2016b
Madagascar	MDG	MG	-	2010	Crottini et al., 2014
Bolivia (Plurinational State of)	BOL	BO	-	1863	Burrowes & De la Riva 2017
United States of America	USA	US	-	1888	Talley et al., 2015
Malaysia	MYS	MY	2001	2006	Swei et al., 2011
Viet Nam	VNM	VN	2001	2016	Swei et al., 2011
Congo Democratic Republic of the	COD	CD	-	1950	Seimon et al., 2015
Australia	AUS	AU	-	1993	Berger et al., 1998
Panama	PAN	PA	-	1997	Berger et al., 1998
Cameroon	CMR	CM	-	1933	Zhu et al., 2014
Costa Rica	CRI	CR	-	1986	Puschendorf et al., 2006a
Tanzania United Republic of	TZA	TZ	-	2008	Gower et al., 2013
Argentina	ARG	AR	-	2002	Herrera et al., 2005
Guatemala	GTM	GT	-	1980	Mendelson et al., 2014
Lao People's Democratic Republic	LAO	LA	-	2007	Swei et al., 2011
Honduras	HND	HN	-	2003	Puschendorf et al., 2006b
South Africa	ZAF	ZA	-	1938	Weldon et al., 2004
French Guiana	GUF	GF	-	2009	Courtois et al., 2015
Sri Lanka	LKA	LK	2001	2001	Swei et al., 2011
Nigeria	NGA	NG	2007	2007	Imasuen et al., 2011
Kenya	KEN	KE	1901	1934	Vredenburg et al., 2013
Philippines	PHL	PH	2001	2005	Swei et al., 2011
Gabon	GAB	GA	-	2009	Bell et al., 2011
Equatorial Guinea	GNQ	GQ	-	1998	Byrne et al., 2019
Mozambique	MOZ	MZ	2009	2009	Conradie et al., 2016
Japan	JPN	JP	-	1902	Goka et al., 2009
Malawi	MWI	MW	-	1969	Zhu et al., 2014
Uganda	UGA	UG	1901	1934	Vredenburg et al., 2013
Nicaragua	NIC	NI	-	1999	Stark et al., 2017
Cambodia	KHM	KH	-	2010	Mendoza et al., 2011
Ethiopia	ETH	ET	-	2008	Gower et al., 2012
Cuba	CUB	CU	-	2006	Diaz et al., 2007
Chile	CHL	CL	-	1970	Soto-Azat et al., 2013
Eswatini	SWZ	SZ	-	1991	Weldon et al., 2004
Rwanda	RWA	RW	-	2010	Seimon et al., 2015
Uruguay	URY	UY	2001	2005	Borteiro et al., 2009
Burundi	BDI	BI	-	2011	Byrne et al., 2019
Italy	ITA	IT	-	1978	Canestrelli et al., 2013
Canada	CAN	CA	1895	2005	Ouellet et al., 2005
Belize	BLZ	BZ	2006	2006	Kaiser and Pollinger, 2012
France	FRA	FR	2006	2007	Bielby et al., 2013
Spain	ESP	ES	-	1999	Bosch et al., 2001
El Salvador	SLV	SV	-	2008	Lawson et al., 2011
Russian Federation	RUS	RU	-	2011	Reshetnikov et al., 2014
Turkey	TUR	TR	-	2012	Erismis et al., 2014
Trinidad and Tobago	TTO	TT	2006	2007	Alemu et al., 2008
Lesotho	LSO	LS	-	2006	Smith et al., 2007
Singapore	SGP	SG	2015	2015	Chong et al. 2018
Puerto Rico	PRI	PR	-	1976	Burrowes et al., 2004
Jamaica	JAM	JM	-	2010	Holmes et al., 2014
Greece	GRC	GR	-	-	-
Serbia	SRB	RS	-	2015	Mali et al., 2017
Germany	DEU	DE	2003	2009	Ohst et al., 2013
Switzerland	CHE	CH	-	2007	Tobler et al., 2012
Korea (Democratic People's Republic of)	PRK	KP	1910	1910	Fong et al., 2015
Korea Republic of	KOR	KR	2001	2006	Swei et al., 2011
Portugal	PRT	PT	-	2009	Rosa et al., 2013
Czechia	CZE	CZ	2002	2008	Balaz et al., 2014a
Netherlands	NLD	NL	-	2008	Spitzen-Van der Sluijs et al., 2014
Slovakia	SVK	SK	-	2008	Balaz et al., 2014a
Austria	AUT	AT	2008	2008	Sztatecsny and Glaser, 2011
Romania	ROU	RO	-	2011	Voeroes et al., 2013
Belgium	BEL	BE	-	2008	Spitzen-Van der Sluijs et al., 2014
Albania	ALB	AL	-	2013	Vojar et al., 2017
Hungary	HUN	HU	-	2004	Balaz et al., 2014a
Montenegro	MNE	ME	-	2013	Vojar et al., 2017
United Kingdom of Great Britain and Northern Ireland	GBR	GB	-	2008	Tinsley et al., 2015
Denmark	DNK	DK	-	2007	Scalera et al., 2008
Morocco	MAR	MA	-	2006	El Mouden et al., 2011
Sweden	SWE	SE	-	2015	Karvemo et al 2018
Israel	ISR	IL	2013	2013	Perl et al., 2017
New Zealand	NZL	NZ	-	2006	Bishop et al., 2009
Sao Tome and Principe	STP	ST	-	2001	Byrne et al., 2019
Kyrgyzstan	KGZ	KG	-	2005	Swei et al., 2011
Dominica	DMA	DM	-	2002	Hudson et al., 2016
Saint Vincent and the Grenadines	VCT	VC	-	2015	Sweeney, 2016
Montserrat	MSR	MS	-	2011	Hudson et al., 2019
